# Supplementary material
Source: PubMed Central journal article supplement (PMC6711396)
Supplement: NIHMS1529795-supplement-1.pdf [file NIHMS1529795-supplement-1.pdf]

## Supplemental Data

# SLC19A1 is an importer of the immunotransmitter cGAMP

Christopher Ritchie<sup>1, 3, 4</sup>, Anthony F. Cordova<sup>1, 3, 4</sup>, Gaelen T. Hess<sup>2, 3</sup>, Michael C. Bassik<sup>2, 3</sup>, and Lingyin Li<sup>1, 3, 5\*</sup>

<sup>1</sup>Department of Biochemistry, Stanford University, Stanford, CA 94305, USA

<sup>2</sup>Department of Genetics, Stanford University, Stanford, CA 94305, USA

<sup>3</sup>Program in Chemistry, Engineering, and Medicine for Human Health (ChEM-H), Stanford University, Stanford, CA 94305, USA

<sup>4</sup>These authors contributed equally

<sup>5</sup>Corresponding Author

\*Lead Contact: [lingyinl@stanford.edu](mailto:lingyinl@stanford.edu)

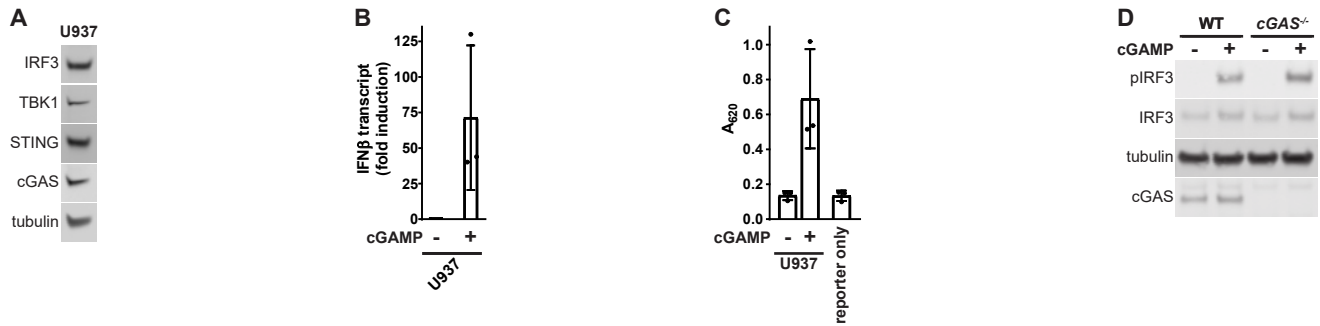

**E**

|                | LD <sub>50</sub> Screen |              |                                   | LD <sub>30</sub> Screen |              |                                   |
|----------------|-------------------------|--------------|-----------------------------------|-------------------------|--------------|-----------------------------------|
|                | casTLE Effect           | casTLE Score | casTLE p-value (Maximum Estimate) | casTLE Effect           | casTLE Score | casTLE p-value (Maximum Estimate) |
| <b>TMEM173</b> | 8.6                     | 537          | $9.08 \times 10^{-6}$             | 4.8                     | 459          | $1.00 \times 10^{-5}$             |
| <b>IRF3</b>    | 8                       | 507          | $9.08 \times 10^{-6}$             | 4.7                     | 372          | $1.00 \times 10^{-5}$             |
| <b>TBK1</b>    | 7.6                     | 465          | $9.08 \times 10^{-6}$             | 4.3                     | 308          | $1.00 \times 10^{-5}$             |
| <b>SLC19A1</b> | 4.8                     | 187          | $9.08 \times 10^{-6}$             | 3.5                     | 226          | $1.00 \times 10^{-5}$             |

**Figure S1. A Genetic Screen Identifies Putative Components of the Extracellular cGAMP-STING Pathway, Related to Figure 1.**

(A) STING pathway protein levels in U937 cells. Cells were probed for TBK1, IRF3, STING, and cGAS levels using Western blots.

(B) Production of IFN-β mRNA in response to cGAMP treatment. U937 cells were treated with 100 μM cGAMP for 6 h. Total RNA was isolated and fold induction of IFN-β over untreated cells was quantified by RT-qPCR (n = 3 biological replicates).

(C) Production of IFN-β protein in response to cGAMP treatment. U937 cells were treated with 100 μM cGAMP for 6 h. Supernatant containing secreted IFN-β was then collected and added to HEK-Blue IFN-α/β reporter cells to quantify IFN-β protein levels (n = 3 biological replicates).

(D) Effect of cGAS on extracellular cGAMP signaling. U937 WT and cGAS<sup>-/-</sup> cells were treated with 100 μM cGAMP for 90 min and probed for pIRF3.

(E) Table showing the casTLE effects, scores, and p-values for the STING pathway genes *TMEM173*, *IRF3*, and *TBK1*, as well as the candidate cGAMP importer *SLC19A1*. All values were calculated using the methods described in Morgens *et al.*, 2016.

For (B) and (C) data are shown as mean ± SD.

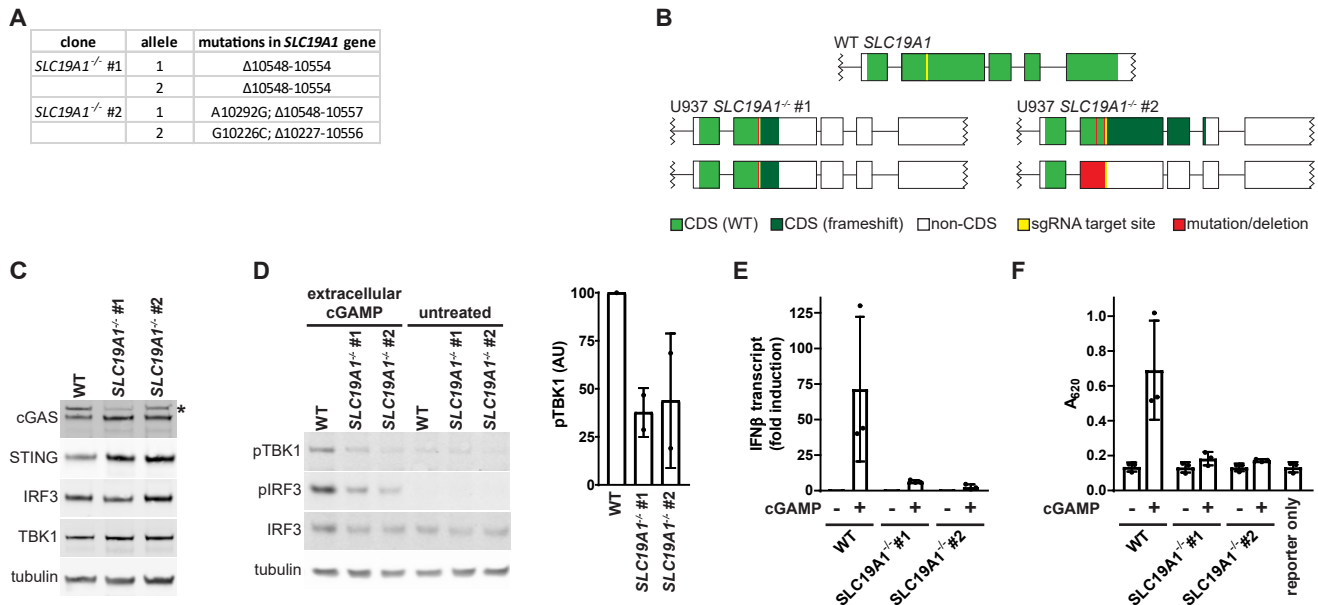

### Figure S2. *SLC19A1* Is Essential for Robust Extracellular cGAMP Signaling in U937 Cells, Related to Figure 2.

(A) Mutations at *SLC19A1* loci in U937 *SLC19A1*<sup>-/-</sup> cell lines. Genomic DNA was isolated from U937 *SLC19A1*<sup>-/-</sup> cells and 800 bp of DNA flanking the *SLC19A1* sgRNA target site was sequenced. Note that both alleles in U937 *SLC19A1*<sup>-/-</sup> #1 contain the same mutation, whereas the alleles in U937 *SLC19A1*<sup>-/-</sup> #2 contain different mutations.

(B) Diagrams depicting the predicted coding DNA sequence of *SLC19A1* alleles in *SLC19A1*<sup>-/-</sup> cells. Boxes represent coding exons of *SLC19A1* and horizontal lines represent introns.

(C) STING pathway protein levels in U937 *SLC19A1*<sup>-/-</sup> cells. Cells were probed for TBK1, IRF3, STING, and cGAS levels by Western blot. \* indicates nonspecific band.

(D) Effect of *SLC19A1* knockout on TBK1 phosphorylation in response to extracellular cGAMP. U937 WT and *SLC19A1*<sup>-/-</sup> cells were treated with 100 μM cGAMP for 2 h and then probed for pTBK1 (n = 2 biological replicates).

(E) Effect of *SLC19A1* knockout on IFN-β mRNA production in response to extracellular cGAMP. U937 WT and *SLC19A1*<sup>-/-</sup> cells were treated with 100 μM cGAMP for 6 h. Total RNA was isolated and fold induction of IFN-β over untreated cells was quantified by RT-qPCR (n = 3 biological replicates).

(F) Effect of *SLC19A1* knockout on IFN-β protein production in response to extracellular cGAMP. U937 WT and *SLC19A1*<sup>-/-</sup> cells were treated with 100 μM cGAMP for 6 h. Supernatant containing secreted IFN-β was then collected and added to HEK-Blue IFN-α/β reporter cells to quantify IFN-β protein levels (n = 3 biological replicates).

For (D), (E), and (F) data are shown as mean ± SD.

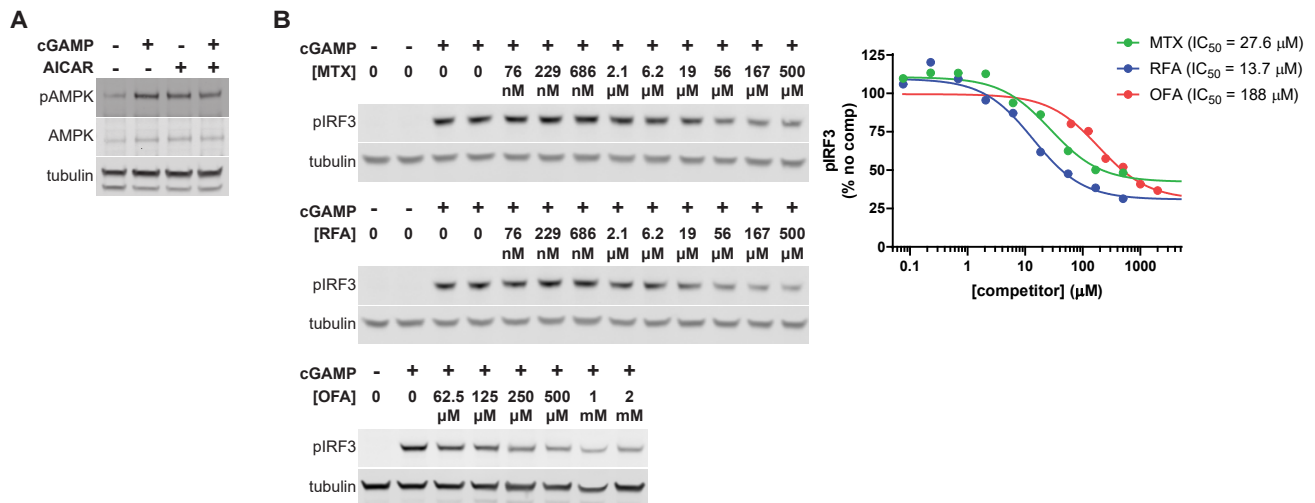

**Figure S3. SLC19A1 Is a Direct cGAMP Importer, Related to Figure 4.**

(A) Combining AICAR and cGAMP treatment does not cause increased pAMPK. U937 cells were pretreated with 1 mM AICAR for 15 min., and then treated with cGAMP for 90 min.

(B) Dose-dependent inhibition of SLC19A1 substrates on extracellular cGAMP signaling. U937 WT cells were treated with 100  $\mu$ M cGAMP in the presence of the indicated concentrations of methotrexate (MTX), folinic acid (RFA), or folic acid (OFA) for 2 h, and then probed for pIRF3.

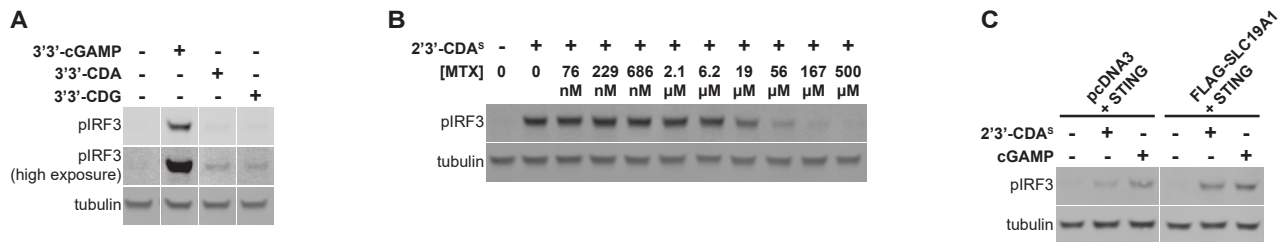

**Figure S4. SLC19A1 Imports Bacterial and Synthetic Cyclic Dinucleotides, Including 2'3'-CDA<sup>S</sup>, Related to Figure 5.**

(A) Extracellular 3'3'-CDN signaling in U937 cells. U937 WT cells were treated with either 200 μM 3'3'-cGAMP, 400 μM 3'3'-CDA, or 400 μM 3'3'-CDG for 3 h.

(B) Dose-dependent inhibition of MTX on extracellular 2'3'-CDA<sup>S</sup> signaling. U937 cells were treated with 15 μM 2'3'-CDA<sup>S</sup> in the presence of various concentrations of MTX for 2 h.

(C) Effect of SLC19A1 overexpression on extracellular 2'3'-CDA<sup>S</sup> signaling. HEK 293T cells were transfected with pcDNA3-STING-HA and either an empty pcDNA3-FLAG-HA vector or pcDNA3-FLAG-HA-SLC19A1, and then were incubated for 24 h to allow for protein production. Transfected cells were then treated with 15 μM 2'3'-CDA<sup>S</sup> for 2 h.

Lanes not relevant to the experiment are removed from (A) and (C) for clarity. Uncropped Western blots are available at <http://dx.doi.org/10.17632/5bssvpns6h.1>

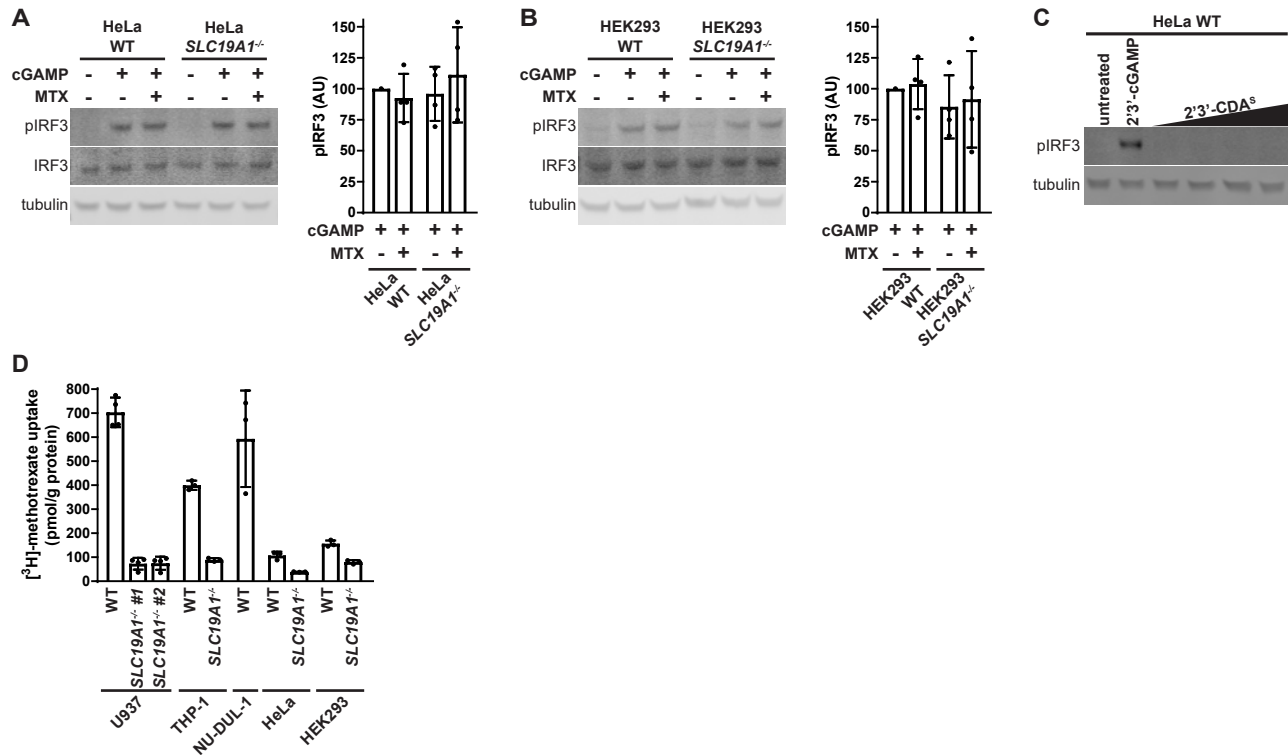

**Figure S5. 2'3'-cGAMP Import Through SLC19A1 Varies Across Cell Lines and Primary Cells, Related to Figure 6.**

(A-B) Role of SLC19A1 on extracellular cGAMP signaling in epithelial cell lines. HeLa (A) or HEK293 (B) WT and *SLC19A1*<sup>-/-</sup> cells were treated with 100 μM cGAMP for 2 h in the presence or absence of 500 μM MTX.

(C) Response of HeLa cells to extracellular 2'3'-CDA<sup>S</sup>. HeLa cells were treated with either 100 μM cGAMP or 15, 20, 25, or 30 μM 2'3'-CDA<sup>S</sup> for 2 h.

(D) SLC19A1 mediated uptake of [<sup>3</sup>H]-methotrexate in U937, THP-1, NU-DUL-1, HeLa, and HEK293 cells. U937 (n = 4 biological replicates), THP-1 (n = 3 biological replicates), NU-DUL-1 (n = 3 biological replicates), HeLa (n = 3 biological replicates), or HEK293 (n = 3 biological replicates) WT and *SLC19A1*<sup>-/-</sup> lines were treated with 17.5 nM [<sup>3</sup>H]-methotrexate for 5 min. For (A), (B), and (D) data are shown as mean ± SD.

| Name                        | Sequence (5'->3')                                                                              |
|-----------------------------|------------------------------------------------------------------------------------------------|
| <b>cDNA Cloning Primers</b> |                                                                                                |
| SLC19A1 FWD                 | taagcatctagaATGGTGCCTCCAGCCCAGC                                                                |
| SLC19A1 REV                 | gcgtgaggatccTCACTGGTTCACATTCTGAACACCG                                                          |
| sscGAS FWD                  | ctggaagtctgttccaggggcccataatgGGCGCCTGGAAGCTCCAGAC                                              |
| sscGAS REV                  | gatctcagtgggtgggtgggtgggtgctcgagCCAAAAAACTGGAAATCCATTGT                                        |
| <b>CRISPR sgRNA Oligos</b>  |                                                                                                |
| cGAS sgRNA TOP              | caccgGGCTTCCGCACGGAATGCCA                                                                      |
| cGAS sgRNA BOT              | aaacTGGCATTCCGTGCGGAAGCCc                                                                      |
| SLC19A1 sgRNA TOP           | caccgGCACGAGAGAGAAGATGT                                                                        |
| SLC19A1 sgRNA BOT           | aaacACATCTTCTCTCTCGTGCC                                                                        |
| <b>NGS Primers</b>          |                                                                                                |
| sgRNA FWD                   | aggcttgatttctataacttcgtatagcatacattatac                                                        |
| sgRNA REV                   | acatgcatggcgtaatacggttatc                                                                      |
| Library prep FWD            | caagcagaagacggcatacgagatgcacaaaaggaaactcacct                                                   |
| Library prep ID 1 REV       | aatgatacggcgaccaccgagatctacacGATCGGAAGAGCACACGTCTGAACTCCAGTC<br>ACCTTGACTCGACTCGGTGCCACTTTTTTC |
| Library prep ID 2 REV       | aatgatacggcgaccaccgagatctacacGATCGGAAGAGCACACGTCTGAACTCCAGTC<br>ACGCCAATCGACTCGGTGCCACTTTTTTC  |
| Library prep ID 3 REV       | aatgatacggcgaccaccgagatctacacGATCGGAAGAGCACACGTCTGAACTCCAGTC<br>ACAGTTCCCGACTCGGTGCCACTTTTTTC  |
| Library prep ID 4 REV       | aatgatacggcgaccaccgagatctacacGATCGGAAGAGCACACGTCTGAACTCCAGTC<br>ACTAGCTTCGACTCGGTGCCACTTTTTTC  |
| <b>qPCR Primers</b>         |                                                                                                |
| ACTB FWD                    | GGCATCCTCACCTGAAGTA                                                                            |
| ACTB REV                    | AGAGGCGTACAGGGATAGCA                                                                           |
| IFNB FWD                    | AAACTCATGAGCAGTCTGCA                                                                           |
| IFNB REV                    | AGGAGATCTTCAGTTTCGGAGG                                                                         |

**Table S1. Oligonucleotides Used in This Study, Related to STAR Methods**
